# Supplementary material
Source: PubMed Central journal article supplement (PMC6768091)
Supplement: NIHMS1537931-supplement-Table_1.pdf [file NIHMS1537931-supplement-Table_1.pdf]

| Variable name          | Description                                             | Variable type         | Category |
|------------------------|---------------------------------------------------------|-----------------------|----------|
| Hindlimb               | Piezo sensor below the animal                           | Analog + Event kernel | Movement |
| Handles (Left / Right) | Touch events from handle sensors                        | Event kernel          | Movement |
| Licks (Left / Right)   | Lick events from spout sensors                          | Event kernel          | Movement |
| Pupil                  | Pupil diameter, extracted from face camera              | Analog + Event kernel | Movement |
| Nose                   | Nose movements, extracted from face camera              | Analog + Event kernel | Movement |
| Whisking               | Whisker movements, extracted from face camera           | Analog + Event kernel | Movement |
| Body                   | Average motion energy across all body camera pixels     | Analog + Event kernel | Movement |
| Video                  | Video dimensions from both cameras (SVD)                | Analog                | Movement |
| Video ME               | Video dimensions from motion energy in both cameras     | Analog                | Movement |
| Time                   | All trials                                              | Event kernel          | Task     |
| Choice                 | All leftward choice trials                              | Event kernel          | Task     |
| Previous choice        | Every trial after a leftward choice trial               | Event kernel          | Task     |
| Previous modality      | Every trial after a visual trial                        | Event kernel          | Task     |
| Previous success       | Every trial after a successful trial                    | Event kernel          | Task     |
| Success                | All successful trials                                   | Event kernel          | Task     |
| Water given            | All frames after a reward was given                     | Event kernel          | Task     |
| Audio (Left / Right)   | All frames after a left- or rightward auditory stimulus | Event kernel          | Task     |
| Vision (Left / Right)  | All frames after a left- or rightward visual stimulus   | Event kernel          | Task     |

**Supplementary Table 1. Model variable overview.**

Overview of all variables that were used in the linear model.
